# Supplementary material for: Sex-specific covariance between metabolic rate, behaviour and morphology in the ground beetle Carabus hortensis
Source: PeerJ. 2021 Dec 15;9:e12455. doi: 10.7717/peerj.12455 (PMC8684319; doi:10.7717/peerj.12455)
Supplement: Supplemental Information 3 — The type of respiration performed (continuous (C) or discontinuous (D)) during AMR measurements (AMR_Type) and during RMR measurements (RMR_Type) by each individual in each trial, and the temperatures at which AMR (AMRTemp), RMR (RMRTemp), and exploration (ExplorationTemp) were measured are given in °C. NA denotes that data could not be obtained either because: (a) the individual was not measured for its AMR; (b) the beetle performed discontinuous respiration; or (c) the individual performed continuous respiration, but remained active throughout a RMR trial, or inactive throughout an AMR trial, meaning that a measure of RMR or AMR could not be obtained (denoted as C*). AMR and RMR are measured in CO2 ml/h. Individuals marked with an asterisk (*) died before a second exploration or RMR test could be made. [file peerj-09-12455-s003.xlsx]

## Sheet: Supplemental Table S3
ID	Sex	AMR_Type	AMR	AMRTemp	RMR_Type	RMR	RMRTemp	Exploration	ExplorationTemp
IX.1	F	NA	NA	NA	C	0.02037	18.2	6	18.1
M12.3.1	F	C	14.1932	20.3	C	0.14097	17.3	18	16.8
Q24.3.1	M	D	NA	NA	C	0.1496	17.3	45	17.3
G9.4.1	F	NA	NA	NA	C	0.35046	17.4	45	17.7
H2.5.1	M	C	5.442	21.4	C	0.42528	19	26	13.3
Z11.3.1	F	NA	NA	NA	C	0.46098	18.3	23	15.9
A1.4.1	F	NA	NA	NA	C	0.47598	18.4	52	14.2
IX.1	F	NA	NA	NA	C	0.48315	18.4	7	20.8
K2.4.1	M	C	7.76	21.5	C	0.55539	17	52	16.3
M8.4.2	F	C	8.67271	20.2	C	0.67266	15	13	17.9
P23.4.2	M	C	12.0465	22.5	C	0.84066	15.2	5	15.4
N14.4.1	M	C	10.7863	19.6	C	1.09029	18.2	6	16.2
B12.4.1	F	NA	NA	NA	C	1.16694	16.5	8	14.8
H7.5.1	M	C	1.25987	21.5	C	1.62117	18.1	27	16.4
F8.2.1	F	NA	NA	NA	C	1.67965	18.568	9	13.1
A6.3.3	F	NA	NA	NA	C	1.81374	16.8	1	15.9
B2.4.1*	F	NA	NA	NA	C	2.20737	18.7	61	18.7
M12.3.1	F	NA	NA	NA	C	2.20897	16.2	38	18.9
A6.3.3	F	NA	NA	NA	C	2.4789	16.5	17	16.3
O20.4.7	M	NA	NA	NA	C	2.52207	18	12	13.2
P22.3.1	F	NA	NA	NA	C	2.55562	16	10	18
F7.4.2	F	NA	NA	NA	C	2.69489	17.3	29	13.4
L2.4.1	F	C	10.5807	20.1	C	2.96859	19.1	8	14.5
H2.5.1	M	NA	NA	NA	C	2.98851	18.057	38	19.5
O16.4.3	F	C	16.7375	21.7	C	3.06561	17.5	27	18.6
J12.4.1	F	NA	NA	NA	C	3.09298	15.7	24	18.9
P15.3.1	M	D	NA	NA	C	3.1256	18.2	6	19.1
P23.4.2	M	NA	NA	NA	C	3.14617	16.8	11	17.5
O16.4.1	M	NA	NA	NA	C	3.21439	18.6	5	17.2
K10.4.1	M	C	9.07	22.2	C	3.58626	18.2	19	13
P22.3.1	F	NA	NA	NA	C	3.65611	18	25	19.8
G12.3.1	F	NA	NA	NA	C	3.70002	19.2	32	16.1
H8.4.1	F	NA	NA	NA	C	3.73692	15.7	14	17
P23.4.1	F	D	NA	NA	C	3.78294	19.5	1	17.1
N14.4.1	M	NA	NA	NA	C	3.85609	18	52	18
B12.4.1	F	NA	NA	NA	C	3.9582	17.8	41	15.6
H2.4.1	F	NA	NA	NA	C	4.00115	17.6	1	22.8
D10.3.1	F	NA	NA	NA	C	4.3746	20.2	1	20.2
D10.4.1	F	C	20.784	22.1	C	4.38153	23.1	7	15.9
J1.3.1	F	C	15.1242	22.2	C	4.43535	15.7	8	16.3
O16.4.1	M	C	13.4299	21.3	C	4.71696	16.3	29	18.4
I1.4.4	M	NA	NA	NA	C	4.9224	17.4	41	15.4
H1.4.1	F	NA	NA	NA	C	5.0014	14.2	13	14.2
IX.2	F	NA	NA	NA	C	5.1555	16.8	9	17.7
M11.4.1	F	NA	NA	NA	C	5.30699	15.7	11	17.4
K2.3.3	F	D	NA	NA	C	5.35614	17.7	7	17.9
M11.4.1	F	NA	NA	NA	C	5.46143	15.8	8	18.8
K2.4.1	M	C	14.1259	21.9	C	5.52795	16	77	17.9
O20.4.7	M	NA	NA	NA	C	5.59262	17.804	26	17.9
L8.4.1*	F	C	6.77398	22.1	C	5.70735	15	7	15
K12.4.1	F	NA	NA	NA	C	5.73039	24.1	49	18.9
G3.2.1	M	NA	NA	NA	C	5.83281	17.6	5	17.2
F4.4.1	M	C	13.798	22.2	C	5.88324	17.9	26	17.9
M8.4.2	F	NA	NA	NA	C	5.89368	17.9	19	17.9
I1.4.1	F	NA	NA	NA	C	6.19107	17.9	14	17.9
A8.4.1	M	NA	NA	NA	C	6.31962	17.4	119	17.7
O16.4.3	F	NA	NA	NA	C	6.41945	15.8	47	16
P24.4.2	F	C	2.76821	22.4	C	6.62913	17.5	6	19.2
H3.4.1	M	C	8.55643	20.7	C	6.73992	17.3	19	19
I1.4.2	F	C	12.3533	23.3	C	7.10541	18.1	1	17.1
K10.3.1	F	NA	NA	NA	C	7.27611	19.9	5	19.9
P24.4.2	F	C	13.3912	22.5	C	7.36603	18.85	9	14.7
IX.2	F	NA	NA	NA	C	7.67997	17.8	28	17.9
M8.4.3	F	NA	NA	NA	C	7.7191	19	39	15.1
I2.3.1	F	D	NA	NA	C	7.85458	17.9	6	17.9
F9.3.1	M	C	12.6172	21.2	C	7.86525	17.9	8	17.9
I1.4.4	M	C	13.0983	20.7	C	7.94133	15.6	59	19.4
G9.4.1	F	NA	NA	NA	C	8.02542	17.5	53	19.9
P15.3.1	M	D	NA	NA	C	8.06475	19.1	34	14.8
K2.3.2	F	D	NA	NA	C	8.16063	14.2	25	14.2
I1.3.1	M	NA	NA	NA	C	8.16063	14.8	5	14.8
M8.4.3	F	NA	NA	NA	C	8.60499	15.3	64	19.3
A12.4.2	F	NA	NA	NA	C	8.63979	18.766	20	17.6
N21.4.1	F	C	0.632961	20.5	C	8.73135	19.2	18	16.4
H2.4.1	F	NA	NA	NA	C	9.13478	23.2	10	16.7
E9.4.2	F	C	11.9019	21.3	C	9.50886	18.4	1	14.9
Z11.1	F	NA	NA	NA	C	9.56964	22.2	5	20
G11.4.1*	F	NA	NA	NA	C	9.91811	17.7	6	17.9
E9.4.2	F	C	21.0557	20.9	C	13.0389	18.5	3	19.4
E9.4.1	F	C*	NA	NA	C	13.7923	16.6	14	15
A1.4.1	F	NA	NA	NA	D	NA	NA	87	18.7
A12.4.1	F	NA	NA	NA	C*	NA	NA	24	22.9
A12.4.1	F	NA	NA	NA	C*	NA	NA	51	17.4
A12.4.2	F	NA	NA	NA	C	NA	17.8	7	11.5
A6.3.1	F	C	20.4067	20.9	C*	NA	NA	28	18
A6.3.1	F	C	22.0272	20.9	C*	NA	NA	30	13.2
B11.4.1	F	NA	NA	NA	D	NA	NA	7	13.6
B11.4.1	F	NA	NA	NA	D	NA	NA	14	17.4
B2.4.1*	F	NA	NA	NA	NA	NA	NA	NA	NA
B4.3.1	F	NA	NA	NA	C*	NA	NA	10	17.5
B4.3.1	F	NA	NA	NA	D	NA	NA	15	18.1
B6.4.1	F	C	11.4042	21.9	C*	NA	NA	9	15.8
B6.4.1	F	C	17.8437	21.7	C*	NA	NA	21	18.3
C6.3.1	F	C*	NA	NA	C*	NA	NA	7	14
C6.3.1	F	C*	NA	NA	C*	NA	NA	42	16.2
C8.3.1	F	NA	NA	NA	C*	NA	NA	5	19.7
C8.3.1	F	NA	NA	NA	C*	NA	NA	41	18.1
C8.4.1	F	D	NA	NA	D	NA	NA	8	16.6
C8.4.1	F	D	NA	NA	D	NA	NA	32	16.5
D10.3.1	F	NA	NA	NA	C*	NA	NA	10	18.2
D10.4.1	F	C	28.8493	21.2	C*	NA	NA	59	22.9
D8.3.1	F	C	10.1768	22.3	C*	NA	NA	7	16.3
D8.3.1	F	C	10.7223	22	C*	NA	NA	27	19.7
E9.4.1	F	C*	NA	NA	D	NA	NA	20	17.8
F11.3.1	F	C	12.5249	22.3	C*	NA	NA	36	21.9
F11.3.1	F	C	15.0128	22.5	C*	NA	NA	42	13.1
F7.4.2	F	NA	NA	NA	C*	NA	NA	35	17.3
F8.2.1	F	NA	NA	NA	C*	NA	NA	22	16.6
G11.4.1*	F	NA	NA	NA	NA	NA	NA	NA	NA
G12.3.1	F	NA	NA	NA	C*	NA	NA	70	19.2
G3.4.1	F	C	12.2409	20.2	C*	NA	NA	5	19.3
G3.4.1	F	C	12.4	20.4	C*	NA	NA	18	14.4
G8.3.1*	F	NA	NA	NA	C*	NA	NA	21	19.3
G8.3.1*	F	NA	NA	NA	NA	NA	NA	NA	NA
H1.4.1	F	NA	NA	NA	C*	NA	NA	75	19.7
H8.4.1	F	NA	NA	NA	C*	NA	NA	25	15.7
I1.4.1	F	NA	NA	NA	C*	NA	NA	35	18.1
I1.4.2	F	C	18.6558	21.3	C*	NA	NA	4	18.1
I12.3.1	F	NA	NA	NA	C*	NA	NA	36	14.6
I12.3.1	F	NA	NA	NA	C*	NA	NA	60	19.2
I2.3.1	F	D	NA	NA	C*	NA	NA	69	17.8
J1.3.1	F	C	15.8238	22	C*	NA	NA	18	15.7
J11.4.1	F	NA	NA	NA	C*	NA	NA	9	18.4
J11.4.1	F	NA	NA	NA	C*	NA	NA	44	14
J12.4.1	F	NA	NA	NA	D	NA	NA	42	15.7
K10.3.1	F	NA	NA	NA	D	NA	NA	37	18.1
K12.4.1	F	NA	NA	NA	C*	NA	NA	133	24.1
K2.3.1	F	NA	NA	NA	C*	NA	NA	20	13.7
K2.3.1	F	NA	NA	NA	D	NA	NA	28	15.5
K2.3.2	F	D	NA	NA	C*	NA	NA	30	19.2
K2.3.3	F	D	NA	NA	D	NA	NA	27	17.7
L2.3.1	F	NA	NA	NA	C*	NA	NA	14	17.5
L2.3.1	F	NA	NA	NA	C*	NA	NA	41	21.1
L2.4.1	F	C	15.1613	20.4	C*	NA	NA	24	19.1
L8.4.1*	F	C	8.24417	22.2	NA	NA	NA	NA	NA
M8.4.1*	F	NA	NA	NA	C*	NA	NA	4	13.4
M8.4.1*	F	NA	NA	NA	NA	NA	NA	NA	NA
N21.4.1	F	C	1.0573	20.8	C*	NA	NA	35	19.2
O23.4.2	F	NA	NA	NA	C*	NA	NA	44	19
O23.4.2	F	NA	NA	NA	C*	NA	NA	46	13.5
P21.3.1	F	NA	NA	NA	C*	NA	NA	17	15.1
P21.3.1	F	NA	NA	NA	D	NA	NA	65	19.3
P23.4.1	F	D	NA	NA	C*	NA	NA	43	19.5
Z1.1	F	NA	NA	NA	C*	NA	NA	9	14.8
Z1.1	F	NA	NA	NA	C*	NA	NA	54	19.3
Z11.1	F	NA	NA	NA	C*	NA	NA	38	22.2
Z11.3.1	F	NA	NA	NA	C*	NA	NA	43	18.3
Z2.1	F	NA	NA	NA	C*	NA	NA	6	16.8
Z2.1	F	NA	NA	NA	C*	NA	NA	42	18.3
A8.4.1	M	NA	NA	NA	D	NA	NA	69	17.4
B4.3.2	M	C	10.256	21.7	C*	NA	NA	13	20
B4.3.2	M	NA	NA	NA	C*	NA	NA	46	15.1
B5.3.2	M	NA	NA	NA	C*	NA	NA	63	17.7
B5.3.2	M	NA	NA	NA	C*	NA	NA	119	17.8
D12.4.2	M	C	2.042	21.3	C*	NA	NA	37	12.3
D12.4.2	M	NA	NA	NA	C*	NA	NA	82	17.9
F4.4.1	M	C	11.128	22.2	C*	NA	NA	32	13.3
F9.3.1	M	NA	NA	NA	C*	NA	NA	11	16.4
G3.2.1	M	NA	NA	NA	D	NA	NA	6	17
G8.3.2	M	C	9.62	21.4	C*	NA	NA	8	17.7
G8.3.2	M	C	9.62044	21.4	C*	NA	NA	41	19.4
H1.4.2	M	C	11.8982	22.1	C*	NA	NA	26	16.7
H1.4.2	M	NA	NA	NA	C*	NA	NA	54	22.8
H3.4.1	M	NA	NA	NA	C	NA	17.3	41	19
H7.5.1	M	NA	NA	NA	C*	NA	NA	36	18.1
I1.3.1	M	NA	NA	NA	C*	NA	NA	20	19.3
I8.3.1	M	NA	NA	NA	C*	NA	NA	11	18.1
I8.3.1	M	NA	NA	NA	C*	NA	NA	14	15.4
J11.4.2	M	C	16.837	21.3	C*	NA	NA	8	19.6
J11.4.2	M	C	17.5682	21.4	C*	NA	NA	36	17.8
K10.4.1	M	C	12.502	22.3	C*	NA	NA	60	18.2
N14.4.2	M	NA	NA	NA	C*	NA	NA	34	17.4
N14.4.2	M	NA	NA	NA	C*	NA	NA	37	13.5
Q24.3.1	M	D	NA	NA	D	NA	NA	66	16.6
Z9.4.2	M	NA	NA	NA	C*	NA	NA	5	16
Z9.4.2	M	NA	NA	NA	C*	NA	NA	54	19.3
