# Supplementary material for: Sex-specific covariance between metabolic rate, behaviour and morphology in the ground beetle Carabus hortensis
Source: PeerJ. 2021 Dec 15;9:e12455. doi: 10.7717/peerj.12455 (PMC8684319; doi:10.7717/peerj.12455)
Supplement: Supplemental Information 4 — The week during which the individual was measured for its active metabolic rate (AMR), resting metabolic rate (RMR), and exploratory behaviour (Exploration; the number of square visits in a novel environment), is given. The beetle ID, sex, body mass (g), and body size (pronotum width, in mm) of each individual is given. ExplorationTemp and MetabolicTemp describe the temperatures at which exploratory behaviour and metabolic rate (MR, CO2ml/h) were measured. ‘Type_MR’ denotes whether RMR or AMR was measured. Data was used for analysis only when individuals demonstrated continuous respiration. RMR was analysed only when individuals remained at rest for a period of 3 min or longer, and AMR was analysed from periods when individuals were active, as described in the ‘Metabolic Rate Analysis’ Methods section. [file peerj-09-12455-s004.xlsx]

## Sheet: Supplemental Table S4
ID	Week	Sex	Body_Mass	Body_Size	ExplorationTemp	Exploration	MetabolicTemp	MR	Type_MR	Avg_Body_Mass
A1.4.1	2	F	0.6981	8.3	14.2	52	18.4	0.47598	RMR	0.6981
A12.4.2	2	F	0.8922	8.3	11.5	7	18.766	8.63979	RMR	0.8922
A6.3.1	3	F	0.683	7.5	20.8	78	20.54	14.9747	AMR	0.6832
A6.3.3	3	F	0.6885	7.2	16.3	17	16.8	1.81374	RMR	0.68245
A6.3.3	5	F	0.6764	7.2	15.9	1	16.5	2.4789	RMR	0.68245
A8.4.1	1	M	0.5258	5.8	17.4	69	17.6	6.31962	RMR	0.5258
B12.4.1	3	F	0.6569	9.5	15.6	41	16.5	1.16694	RMR	0.63065
B12.4.1	5	F	0.6044	9.5	14.8	8	17.8	3.9582	RMR	0.63065
B2.4.1	4	F	0.6834	7.3	18.7	61	16.6	2.20737	RMR	0.6834
B4.3.2	10	M	0.602	8.2	21.5	59	21.52	10.714	AMR	0.6015
B6.4.1	3	F	0.689	7.9	21.4	90	21.7	19.8827	AMR	0.6888
D10.3.1	3	F	0.5919	8	20.2	1	19.1	4.3746	RMR	0.5919
D10.4.1	1	F	0.8995	7.9	22.9	59	23.1	4.38153	RMR	0.8585
D10.4.1	6	F	0.818	7.9	22.2	81	21.38	15.5978	AMR	0.8585
D12.4.2	4	M	0.556	6.8	20.8	74	21.3	8.24891	AMR	0.5564
D8.3.1	8	F	0.671	9.2	21.9	44	22.2	9.63381	AMR	0.6707
E9.4.1	3	F	0.7626	7.2	17.8	20	16.6	13.7923	RMR	0.7626
E9.4.2	2	F	0.6628	7.2	14.9	1	18.5	13.0389	RMR	0.621067
E9.4.2	4	F	0.6001	7.2	19.4	3	18.4	9.50886	RMR	0.621067
E9.4.2	5	F	0.6	7.2	21	9	21.32	15.1204	AMR	0.621067
F11.3.1	5	F	0.55	7.8	21.8	35	22.02	10.4364	AMR	0.5495
F4.4.1	4	M	0.5822	7.1	17.9	26	19.4	5.88324	RMR	0.5821
F4.4.1	8	M	0.582	7.1	22.1	43	22.22	12.1444	AMR	0.5821
F7.4.2	3	F	0.7434	8.1	17.3	35	16.3	2.69489	RMR	0.7434
F8.2.1	2	F	0.7663	8.7	13.1	9	18.568	1.67965	RMR	0.7663
F9.3.1	3	M	0.5338	7.9	17.9	8	17.7	7.86525	RMR	0.5306
F9.3.1	9	M	0.527	7.9	21.2	4	20.9	10.5157	AMR	0.5306
G11.4.1	1	F	0.7959	8.1	17.9	6	17.7	9.91811	RMR	0.7959
G12.3.1	3	F	0.6716	7.7	19.2	70	19.5	3.70002	RMR	0.6716
G3.2.1	3	M	0.5584	8.4	17	6	17.6	5.83281	RMR	0.5584
G3.4.1	3	F	0.691	8	16.6	99	20.45	10.7437	AMR	0.6907
G8.3.2	9	M	0.483	7	21.1	14	21.2	8.73188	AMR	0.4834
G9.4.1	1	F	0.7405	7.3	17.7	45	17.5	8.02542	RMR	0.7429
G9.4.1	3	F	0.7453	7.3	19.9	53	17.4	0.35046	RMR	0.7429
H1.4.1	2	F	0.6167	7.4	14.2	13	18.782	5.0014	RMR	0.6167
H1.4.2	8	M	0.511	7.4	22	66	22.1	19.535	AMR	0.5112
H2.4.1	1	F	0.82	7.2	22.8	1	23.2	9.13478	RMR	0.81255
H2.4.1	3	F	0.8051	7.2	16.7	10	17.6	4.00115	RMR	0.81255
H2.5.1	2	M	0.566	7.8	13.3	26	18.057	2.98851	RMR	0.547733
H2.5.1	3	M	0.558	7.8	22.1	92	21.4	22.5093	AMR	0.547733
H2.5.1	4	M	0.5191	7.8	19.5	38	19	0.42528	RMR	0.547733
H3.4.1	3	M	0.4355	6	19	41	17.3	6.73992	RMR	0.42175
H3.4.1	8	M	0.408	6	20.6	13	20.43	6.78392	AMR	0.42175
H7.5.1	3	M	0.472	6.7	21	28	21.3	10.3868	AMR	0.44255
H7.5.1	4	M	0.4136	6.7	18.1	36	17.4	1.62117	RMR	0.44255
H8.4.1	5	F	0.5127	7.1	15.7	25	16.2	3.73692	RMR	0.5127
I1.3.1	1	M	0.5877	7.1	14.8	5	15.1	8.16063	RMR	0.5877
I1.4.1	3	F	0.5913	7.9	17.9	14	15.6	6.19107	RMR	0.5913
I1.4.2	1	F	0.55	5.8	15.6	17	21.7	16.7184	AMR	0.53555
I1.4.2	4	F	0.5216	5.8	18.1	4	15.4	7.10541	RMR	0.53555
I1.4.4	1	M	0.6575	7.8	15.4	41	15.6	7.94133	RMR	0.641033
I1.4.4	3	M	0.6289	7.8	19.4	59	17.4	4.9224	RMR	0.641033
I1.4.4	6	M	0.637	7.8	20.5	76	21.44	11.0547	AMR	0.641033
I2.3.1	1	F	0.4808	6.7	17.9	6	17.9	7.85458	RMR	0.4808
IX.1	1	F	0.7619	6	18.1	6	18.2	0.02037	RMR	0.7392
IX.1	3	F	0.7165	6	20.8	7	18.4	0.48315	RMR	0.7392
IX.2	1	F	0.7514	6	17.7	9	17.8	7.67997	RMR	0.7448
IX.2	3	F	0.7382	6	17.9	28	16.8	5.1555	RMR	0.7448
J1.3.1	3	F	0.7928	7.6	15.7	18	16.9	4.43535	RMR	0.79105
J1.3.1	4	F	0.789	7.6	21.9	1	22	12.4327	AMR	0.79105
J11.4.2	6	M	0.612	7.8	21.3	29	21.4	11.8492	AMR	0.6121
J12.4.1	1	F	0.7199	7.9	15.7	42	15.9	3.09298	RMR	0.7199
K10.3.1	3	F	0.5953	8.7	19.9	5	16.5	7.27611	RMR	0.5953
K10.4.1	2	M	0.6384	8.4	13	19	17.879	3.58626	RMR	0.6208
K10.4.1	8	M	0.603	8.4	22.2	36	22.25	12.0956	AMR	0.6208
K12.4.1	1	F	0.6786	8	24.1	133	23.3	5.73039	RMR	0.6786
K2.3.2	1	F	0.6412	6.9	14.2	25	14.4	8.16063	RMR	0.6412
K2.3.3	1	F	0.5892	7	17.7	27	17.7	5.35614	RMR	0.5892
K2.4.1	3	M	0.6036	7.2	17.9	77	17	0.55539	RMR	0.622467
K2.4.1	5	M	0.5982	7.2	16.3	52	16	5.52795	RMR	0.622467
K2.4.1	9	M	0.666	7.2	21.9	82	21.63	8.52779	AMR	0.622467
L2.4.1	3	F	0.673	7.6	19.8	7	19.85	10.9074	AMR	0.64035
L2.4.1	3	F	0.6081	7.6	19.1	24	16	2.96859	RMR	0.64035
L8.4.1	1	F	0.747	7.6	17.5	23	21.9	8.79515	AMR	0.7266
L8.4.1	2	F	0.7064	7.6	15	7	17.7	5.70735	RMR	0.7266
M11.4.1	3	F	0.7139	7.5	18.8	8	15.7	5.30699	RMR	0.69675
M11.4.1	5	F	0.6796	7.5	17.4	11	15.8	5.46143	RMR	0.69675
M12.3.1	2	F	0.76	7.9	12.5	14	18.52	14.1932	AMR	0.7167
M12.3.1	3	F	0.6892	7.9	18.9	38	16.2	2.20897	RMR	0.7167
M12.3.1	5	F	0.7009	7.9	16.8	18	17.3	0.14097	RMR	0.7167
M8.4.2	1	F	0.6821	7.4	17.9	19	17.9	5.89368	RMR	0.692933
M8.4.2	3	F	0.6823	7.4	17.9	13	15	0.67266	RMR	0.692933
M8.4.2	7	F	0.714	7.4	20.1	9	20.2	8.77638	AMR	0.692933
M8.4.3	1	F	0.7148	6.8	15.1	39	15.3	8.60499	RMR	0.6948
M8.4.3	3	F	0.6748	6.8	19.3	64	19	7.7191	RMR	0.6948
N14.4.1	2	M	0.567	7.5	14.1	30	19.6	10.2943	AMR	0.5555
N14.4.1	2	M	0.5436	7.5	16.2	6	18	3.85609	RMR	0.5555
N14.4.1	4	M	0.5555	7.5	18	52	18.2	1.09029	RMR	0.5555
N21.4.1	3	F	0.604	6.4	19.2	35	17.9	8.73135	RMR	0.5949
N21.4.1	7	F	0.586	6.4	20.5	77	20.5	9.99513	AMR	0.5949
O16.4.1	2	M	0.582	7.6	12.7	8	20.3	9.42279	AMR	0.569267
O16.4.1	3	M	0.5515	7.6	17.2	5	16.3	4.71696	RMR	0.569267
O16.4.1	5	M	0.5744	7.6	18.4	29	18.6	3.21439	RMR	0.569267
O16.4.3	1	F	0.9095	7.9	16	47	15.8	6.41945	RMR	0.904967
O16.4.3	3	F	0.9036	7.9	18.6	27	17.5	3.06561	RMR	0.904967
O16.4.3	7	F	0.902	7.9	21.7	84	21.8	12.3831	AMR	0.904967
O20.4.7	2	M	0.6412	7.6	13.2	12	17.804	5.59262	RMR	0.62685
O20.4.7	4	M	0.6125	7.6	17.9	26	18	2.52207	RMR	0.62685
P15.3.1	2	M	0.536	7	14.8	34	18.2	3.1256	RMR	0.53435
P15.3.1	4	M	0.5327	7	19.1	6	19.1	8.06475	RMR	0.53435
P22.3.1	1	F	0.7918	7.7	18	10	18	3.65611	RMR	0.78185
P22.3.1	3	F	0.7719	7.7	19.8	25	16	2.55562	RMR	0.78185
P23.4.1	3	F	0.7345	7.9	19.5	43	15.9	3.78294	RMR	0.7345
P23.4.2	1	M	0.569	6	17.5	9	22.5	12.5643	AMR	0.552533
P23.4.2	2	M	0.5403	6	15.4	5	15.2	0.84066	RMR	0.552533
P23.4.2	4	M	0.5483	6	17.5	11	16.8	3.14617	RMR	0.552533
P24.4.2	2	F	0.7865	6.9	14.7	9	18.85	7.36603	RMR	0.736167
P24.4.2	4	F	0.7162	6.9	19.2	6	17.5	6.62913	RMR	0.736167
P24.4.2	7	F	0.706	6.9	22.3	1	22.03	9.61153	AMR	0.736167
Q24.3.1	2	M	0.4479	6	17.3	45	16.8	0.1496	RMR	0.4479
Z11.1	1	F	0.8498	8.9	22.2	38	22.3	9.56964	RMR	0.8498
Z11.3.1	3	F	0.6176	8.5	18.3	43	17.3	0.46098	RMR	0.6176
